1 **Full title: The landscape and level of alcohol policy enforcement in Tanzania**

2 **Short title: Alcohol policy enforcement in Tanzania**

3 **Kim Madundo<sup>a,b</sup>, Aliza Hudda<sup>c</sup>, Maaike L. Seekles<sup>c</sup>, Blandina Mmbaga<sup>d,e</sup>, Angela Obasi<sup>c,f</sup>**

4 (a) Department of Mental Health and Psychiatry, Kilimanjaro Christian Medical University  
5 College, Moshi, Tanzania

6 (b) Department of Mental Health and Psychiatry, Kilimanjaro Christian Medical Centre, Moshi,  
7 Tanzania

8 (c) The Liverpool School of Tropical Medicine, Department of International Public Health,  
9 Liverpool, UK

10 (d) Department of Paediatric and Child Health, Kilimanjaro Christian Medical University College,  
11 Moshi, Tanzania

12 (e) Kilimanjaro Clinical Research Institute, Moshi, Tanzania

13 (f) AXESS Sexual Health, Royal Liverpool University Hospitals NHS Foundation Trust,  
14 Liverpool, UK

15 Corresponding author: Kim Madundo, [kimmadundo@yahoo.com](mailto:kimmadundo@yahoo.com)

16

17

18

19

20

21

22

23 **Abstract**

24 Harmful use of alcohol causes more deaths in Sub-Saharan Africa than in any other region. In  
25 Tanzania, where alcohol use disorders rates are twice the overall African average, harmful alcohol  
26 consumption is a public health concern. Given the lack of a contemporary overview of the alcohol  
27 policy landscape, we conducted a mixed-methods review of key alcohol-related policies,  
28 implementers, and initiatives in Tanzania. We conducted a desk-based review of policy-related  
29 documents, and in-depth interviews with eight key informants guided by the 10-composite-  
30 indicator framework of a tool for measuring alcohol policy implementation developed by World  
31 Health Organization. Representatives were from health-service delivery, community-based  
32 organizations, governmental organizations, research, and policymakers whose work is related to  
33 alcohol in Tanzania. Data was collected in October 2021, June 2022, and finalized in March 2023.  
34 Findings were analyzed using Microsoft Word v2021. Themes were identified, collected,  
35 combined, and tabulated. Differences were then resolved by first and second authors. Our  
36 findings revealed no single comprehensive national alcohol policy. Pending finalization of a draft  
37 policy, various documents and actors govern alcohol production, distribution, licensing, and  
38 consumption. Little intersectoral linkage between entities contributes to poor enforcement of these  
39 regulations. Regulation is stronger in urban areas, and restrictions more effective on industrial  
40 alcohol. However, the majority of consumed alcohol in Tanzania is informally-produced, especially  
41 in rural settings. Socio-cultural context plays a key role in alcohol production and consumption,  
42 contributing to early-age exposure to alcohol. Alcohol is a growing source of revenue for the  
43 Tanzanian government and, therefore, imposing further restrictions is a low priority. There are  
44 important policy gaps in various sectors pertaining to alcohol regulation. Our results strongly  
45 suggest the need for a comprehensive approach to developing an overarching alcohol policy, with

46 involvement of key stakeholders, stronger enforcement, and increased awareness, resources,  
47 and collaborations.

## 48 **Introduction**

49 The harmful use of alcohol causes approximately 3 million deaths every year worldwide (1). In  
50 Sub-Saharan Africa (SSA), alcohol accounts for more deaths than in any other region. The  
51 reduction of harmful alcohol use is a particular priority in Tanzania, where alcohol use disorders  
52 are twice, and rates of heavy episodic drinking are six times, the Africa Region average (2). Much  
53 of this increased risk begins in adolescence (10-19y). Early (aged <15y) alcohol initiation is  
54 common, and is more likely to cause dependency issues compared to those who begin drinking  
55 above 21 (2). Adults with violence-related injuries are more than six times as likely to have a  
56 history of harmful alcohol use (3). Hazardous alcohol consumption is associated with higher odds  
57 of a comorbid mental disorder than in the general population (4). Harmful drinking has been linked  
58 to insufficient regulations and restrictions on exposure to alcohol-related cues (2,5). There is a  
59 need to delay and decrease alcohol use, but a lack of national-level integrated regulations to  
60 reinforce this (6). Our study aimed to gain an understanding of alcohol related policy and  
61 legislation, and to understand how the enforcement of such policies may affect alcohol use.

62 Published by WHO in 2018, The *Global Strategy to reduce the harmful use of alcohol* is the most  
63 comprehensive international alcohol policy document. This report is endorsed by World Health  
64 Organization (WHO) Member States, who commit to periodically provide country-level data on  
65 alcohol consumption and related harm, and develop and implement national alcohol policies. The  
66 strategy recommends a portfolio of national-level policy options and interventions across ten  
67 target areas that could be considered for implementation: Leadership, awareness, and  
68 commitment; health services' response; community action; drink-driving policies and  
69 countermeasures; availability of alcohol; marketing of alcoholic beverages; pricing policies;  
70 reducing the negative consequences of drinking and alcohol intoxication; reducing the public

71 health impact of illicit alcohol and informally produced alcohol; and monitoring and surveillance  
72 (2). Through these standard ten markers, this framework serves as a reference point for  
73 measurement and comparison of enforcement and implementation across countries worldwide.  
74 An action plan (2022-2030) was recently adopted to guide the effective implementation of the  
75 strategy (7). Separately, in 2019, the East African Community (EAC) regional policy intended to  
76 comprehensively address disparity in policies, programs, and practices, and reduce negative  
77 outcomes related to harmful use of alcohol and other drugs (8).

78 Aside from a page in the Global Status Report on Alcohol and Health (2018), there is no recent  
79 and detailed overview of what the alcohol policy landscape in Tanzania looks like. In response,  
80 this paper presents the findings of an iterative, mixed-methods policy review. It aims to provide  
81 an overview of key alcohol-related policies and enforced alcohol control measures, including  
82 national-level initiatives and stakeholders.

### 83 **Materials and Methods**

84 Our review was conducted in two stages: a desk-based review of policy-related documents in  
85 Tanzania, and in-depth interviews (IDIs) with key informants. WHO-recommended target areas  
86 and corresponding indicators for alcohol-related policy and interventions provided the framework  
87 for the searches and IDIs and analysis. National-level key informants, initiatives, and  
88 implementers who could offer insight into alcohol-related policies and their enforcement across  
89 Tanzania were purposively selected.

### 90 **Data collection**

91 Firstly, two researchers conducted a desk-based review starting on 17th October 2022, which  
92 was then updated in March 2023 to ensure any more recent documents were included. A broad  
93 Google Search was conducted, using the following terms: '[Policy OR Law OR Act OR regulation  
94 OR legislation] AND [Alcohol OR Liquor OR Brew] AND [Tanzania]'. This returned 80 unique and  
95 relevant results.

96 This open search was followed by targeted searches, informed by WHO target areas and  
97 indicators for policy implementation (9,10) and a landscape analysis of alcohol-related policies in  
98 Tanzania published in 2012 (11).

99 Relevant search results were downloaded to a shared folder. Content eligible for inclusion was  
100 that describing key policy/actors/plans/strategies related to alcohol consumption in Tanzania, and  
101 whereby majority of the content was related to alcohol consumption, and enforced or applicable  
102 in Tanzania. Information related to policies and interventions was extracted and a directory of all  
103 Tanzanian ministries and special offices with governance over alcohol-related activities was  
104 created (*Figure 1*). Websites of these actors were searched for any final relevant sources.

105 **Figure 1. Organogram of government departments relevant to alcohol-related policies in**  
106 **Tanzania.**

107 Secondly, six IDIs were conducted beginning from 10<sup>th</sup> June 2022, and another two ending on  
108 31<sup>st</sup> March 2023. In addition to perspectives from relevant stakeholders, interviews gathered  
109 further information on policies and initiatives related to WHO target areas. Informants were  
110 representatives of health-service delivery, community-based organizations (CBOs),  
111 governmental organizations, researchers, and policymakers whose work is related to alcohol  
112 consumption in Tanzania (see Table 1).

113 **Table 1. Participant characteristics**

| <b>Participant Number</b> | <b>Gender</b> | <b>Years of Work Experience</b> | <b>Private/Public Sector</b> | <b>Scale/Level of Operations</b> |
|---------------------------|---------------|---------------------------------|------------------------------|----------------------------------|
| #1                        | Male          | 19                              | Private                      | Regional                         |
| #2                        | Male          | 12                              | Public                       | Regional                         |

|    |        |    |         |          |
|----|--------|----|---------|----------|
| #3 | Male   | 20 | Private | National |
| #4 | Male   | 20 | Private | Regional |
| #5 | Male   | 10 | Public  | National |
| #6 | Male   | 5  | Public  | Regional |
| #7 | Male   | 7  | Public  | National |
| #8 | Female | 4  | Private | City     |

114

115 We decided on this number of IDIs based on the overlap in responders' areas of expertise and  
 116 having reached saturation across our data collection. Topic guide questions were designed to  
 117 cover all target areas (e.g., relevant policies, health service delivery, efforts to combat harmful  
 118 alcohol use in the community, schools, and workplace, and availability of alcohol), but were  
 119 adapted to fit with participant's area of expertise/work (Table 2).

120 **Table 2. In-depth interview content, participants interviewed and their respective areas of**  
 121 **expertise**

| <b>Composite indicator</b>            | <b>IDI participant number(s) and respective areas of expertise</b>                                                                                                                                                       |
|---------------------------------------|--------------------------------------------------------------------------------------------------------------------------------------------------------------------------------------------------------------------------|
| Leadership, awareness, and commitment | #1 – CBO Representative, Peer support<br>#2 – Social Welfare Officer<br>#3 – CBO Representative, Policy maker<br>#5 – Ministry-level Official, Mental Health Professional, Researcher<br>#6 – Mental Health Professional |

|                                                                                      |                                                                                                          |
|--------------------------------------------------------------------------------------|----------------------------------------------------------------------------------------------------------|
|                                                                                      | #8 – Marketing Officer                                                                                   |
| Health services’ response                                                            | #2, #3, #6                                                                                               |
| Community action                                                                     | #1, #2, #3<br><br>#4 – Researcher, Mental Health Professional<br><br>#7 – Curriculum Developer, Educator |
| Drink-driving policies and countermeasures                                           | #2, #5, #8                                                                                               |
| Availability of alcohol                                                              | #1, #2, #4, #6, #8                                                                                       |
| Marketing of alcoholic beverages                                                     | #1, #5, #7, #8                                                                                           |
| Pricing policies                                                                     | #2, #5, #6, #8                                                                                           |
| Reducing the negative consequences of drinking and alcohol intoxication              | #1, #2, #4, #5, #6, #7                                                                                   |
| Reducing the public health impact of illicit alcohol and informally produced alcohol | #1, #2, #4, #5, #6, #7                                                                                   |
| Monitoring and surveillance                                                          | #4, #5, #6                                                                                               |

122

123 IDIs lasted an average of 40 minutes, were conducted in English or Kiswahili, and either in-person

124 or virtually through video communications platform ‘Zoom’ depending on location and preference

125 of informant. Each interview was given a code number. Participants were reimbursed 10,000

126 Tanzanian shillings for their participation. No identifying information was collected or recorded

127 during IDIs.

128 IDI recordings were transferred from voice-recorder to a password-protected computer only  
129 accessed by KM and AH, who also transcribed the IDIs. These were then translated to English  
130 by the research team, allowing for triangulation of the translations for accuracy. Once complete,  
131 transcriptions, translations, and IDI recordings were uploaded to a secure server.

### 132 **Analysis**

133 Google search results were analyzed by KM and AH; themes were identified, collected and  
134 combined in tabulated form. Differences were then resolved by KM and AH, and MS was  
135 consulted upon any further disagreements.

136 IDIs were analyzed using Microsoft Word v2021. Quotes were interpreted, color-coded and  
137 grouped according to their thematic areas based on WHO target areas, by the first author. A  
138 checklist was created indicating the status of policy items in Tanzania; absent, partial restriction,  
139 or total restriction.

140 To ensure trustworthiness of our findings we used interviewer triangulation; two researchers  
141 worked separately, then discussed and resolved differences. A third researcher monitored quality  
142 control of transcripts and codes. All data were triangulated and brought together in one Table, to  
143 provide an overview of the current alcohol policy landscape in Tanzania.

### 144 **Ethical approval and consent to participate**

145 Clearance to conduct this study was granted by research committees at Kilimanjaro Christian  
146 Medical University College (Ref. #2551), the National Institute for Medical Research (Ref:  
147 NIMR/HQ/R.8a/Vol.IX/3932, and Liverpool School of Tropical Medicine (Ref: 21-075). Prior to  
148 IDIs, informants were sent an information sheet describing the purpose of the study and written  
149 informed consent was obtained.



150 **Results**

151 Findings from our online searches and IDIs are presented according to the framework of  
152 composite indicators provided by WHO. See Table 3 for an overview of the reviewed policy-  
153 related documents, along with their linking components within the WHO framework.

154 **Table 3. Relevant policy-related documents Error! Reference source not found.**

155 **Leadership, awareness and commitment**

156 The WHO framework states that member states should exhibit leadership and create awareness  
157 around challenges associated with alcohol consumption within their respective countries. They  
158 should also demonstrate commitment to controlling such challenges through adequately funded,  
159 comprehensive and intersectoral national policies (2).

160 Our searches and IDIs revealed no national alcohol policy or subsequent action plan.

161 **Participant #5:** “First, we do not have such a [alcohol] policy so far. A national alcohol  
162 policy - which was being developed through the bench where I am, but it is a draft. I think  
163 - to be made about five to seven years ago. I think it lacked financing”

164 **Participant #3:** “I don't think if there is a policy that talks about the use of alcohol”

165 Pending a single all-inclusive policy, various documents and government authorities govern  
166 activities related to alcohol. There is little intersectoral linkage between these documents and  
167 bodies.

168 **Participant #5:** “There is a need for cooperation in the various enforcement agencies so  
169 that so that the implementation can be done well”

170 Imposing further restrictions on the alcohol industry and committing to a national policy was  
171 consistently reported as a low priority by respondents.

172 **Participant #5:** “There is the EAC regional policy [that talks about preventing, controlling  
173 and managing alcohol and drugs in the EAC]. But if it has guidance, if it affects laws, if it  
174 has an effect here in Tanzania, I haven’t seen it yet”

175 **Participant #3:** “We have participated in the movement to prepare the National Youth  
176 Council. The law was passed five or six years ago but the Council has never been  
177 founded. If the council is formed, it will develop youth throughout the country. That is where  
178 we talk about violence, alcohol, and other deviant behaviour”

179 Overall, participants’ responses indicated that the development of a national alcohol policy is a  
180 low priority, particularly because alcohol is a lucrative source of revenue.

181 **Participant #1:** “I don’t think [it is a priority]. Because we all know very well through  
182 alcohol, they get revenue”

183 **Participant #2:** “I have not seen it [alcohol policy] as something that has been given much  
184 priority. Because alcohol is everyone’s favorite but also... it is the country’s economy”

185 **Participant #8:** “I don’t think it is a priority”

186 **Participant #6:** “So it [alcohol policy] is that the issue is not prioritized? Of course”

187 The government creates and encourages awareness activities on alcohol, often under the  
188 category of Non communicable diseases (NCDs) (12). This is done primarily through Ministry for  
189 Education, Science, and Technology (MoEST), and the Ministry of Health (MoH). Such  
190 awareness campaigns often highlight alcohol as a risk for NCDs. The Tanzania government  
191 recently launched the NCD Research Agenda and NCD Strategic Plan version 3 to guide these  
192 efforts (13). However, community-based organizations have also played a key role in motivating  
193 the government to create awareness and commit to this challenge, as reported by a respondent:

194           **Participant #3:** “They [several Ministers] saw the importance of my organization to start  
195           meeting with students to motivate them and remind them about the contents of the policies  
196           that concern them. Those students have not found platforms”

### 197 **Health services’ response**

198   Member states are required to use a multi-faceted and multi-level approach to create effective  
199   alcohol policies; individual-, family-, and community-level interventions are necessary through the  
200   health sector as a key entry point for people and families who are at risk of harmful alcohol use.  
201   The health sector is well-placed to leverage screening and awareness programs, treatment  
202   services, and advocate for community support (2).

203   Our searches identified the NCD Program as responsible for monitoring and reporting issues  
204   related to NCDs including health conditions caused by and related to alcohol use. However, there  
205   are no known focal national-level individuals or organizations allocated to respond specifically to  
206   alcohol issues alone.

207           **Participant #3:** “In terms of alcohol, there is no board that has been created by the  
208           government”

209   Recent literature has shown a missed opportunity for screening at the primary-care level (14).  
210   While brief interventions, both psychosocial (education for individuals and families, motivational  
211   interviews, referral to support groups) and pharmacological are performed in out- and in-patient  
212   settings, these are often unaffordable, and there are no standalone treatment guidelines for  
213   alcohol-related issues.

214           **Participant #2:** “I feel that they do not monitor the issue of alcohol. What they are following  
215           is to check his health, maybe with reproductive issues. You find it is difficult to monitor  
216           because it is not the main activity there”

217           **Participant #6:** “I can say it is challenging. Many hospitals still do not have psychological  
218           services. 70%, they cannot afford. There are others who have to be referred to a hospital  
219           [for inpatient care] like Lutindi [more than 300km away from here]”

220           Overall therefore, insufficiency of mental health professionals and low integration of mental health  
221           in primary healthcare (15), means that screening for alcohol use is almost exclusively done within  
222           specialty-care settings, which is often less affordable and accessible (16). Likewise, the available  
223           yet insufficient rehabilitation institutions often go beyond their designated scope of work to  
224           compensate for an increasing demand.

### 225           **Community and workplace action**

226           WHO recommends that member states and other implementers support and encourage  
227           communities to be proactive in reducing harmful alcohol use. WHO further recommends  
228           performing rapid assessments to identify priorities, and disparities in knowledge and practice  
229           within these communities (2).

230           The Tanzanian government has made some commitment to supporting community action, with  
231           limited sustainability. One move is attempting to standardize care for people struggling with use  
232           of alcohol and other substances by formulating national guidelines for all sober houses in the  
233           country, finalized in 2018. According to these guidelines sober houses should provide supportive  
234           and controlled living conditions, as well as psychosocial interventions for people with substance  
235           use (and often other related mental health) challenges (17). Due to insufficient rehabilitation  
236           programs in Tanzania, sober houses often provide both rehabilitation and transitional services as  
237           individuals prepare to re-enter their communities (18).

### 238           • **School-based action**

239           While MoEST has created awareness campaigns against harmful use of substances including  
240           alcohol, these happen infrequently, and are particularly rare at the university level, where most

241 students are of legal consumption age. There is a lack of youth awareness and prevention  
242 programs, and the necessity for youth engagement in community action.

243 **Participant #7:** “The issue of alcohol is included very little on the curriculum. If we go to  
244 colleges, they are very specialized and very rare to teach about alcoholism. Maybe it will  
245 happen when we discuss another topic, for example, "If you want to succeed in your  
246 career as a professional, things that you need to avoid [include] alcoholism". But there is  
247 no topic or sub-topic or course or program”

248 **Participant #7:** “I’m sure I can’t name a page or chapter that lets them know the harm of  
249 alcohol. The [Education] policy insists we make school-leavers or university-leavers who  
250 can use education to master the environment and their lives. It emphasizes that but not  
251 directly”

252 The Tanzania Commission for Universities stipulates higher education institutions create  
253 conducive environments for proper conduct among students and staff. Universities then create  
254 regulations which serve as technical tools to guide disciplinary action and healthcare assistance  
255 for students who present with behavioral changes, including those due to alcohol.

256 **Participant #7:** “Regulations are created by colleges, but Tanzania Commission for  
257 Universities also points out it is appropriate for each institution to have examination  
258 regulations and those other disciplinary guidelines”

259 In an attempt to fill this support gap, various non-governmental organizations (NGOs) offer  
260 community-based interventions in Tanzania; Alcoholics Anonymous (AA) is the most widespread  
261 CBO across Tanzania, with seven active support groups in different cities (19). Other NGOs have  
262 created awareness on alcohol and linked people to care, but frequently as part of a program for  
263 Human Immunodeficiency Virus (HIV) care (11).

264           **Participant #1:** “They [government officials] were very happy and said they didn’t know if  
265           there is such a thing (Alcoholics Anonymous) here in town, they wanted us to give them  
266           our contacts. It’s rare to get an invitation directly from the government. I haven’t seen them  
267           again”

## 268   **Drink-driving policies and countermeasures**

269   WHO recommends establishing legal limits on blood-alcohol content while driving, the use of  
270   sobriety checkpoints, and sanctions for infraction of these regulations. It is further recommended  
271   that drivers’ licenses be provided on a multiple phase system to ensure sufficient training (2).

272   Tanzania has defined a maximum prescribed blood-alcohol limit for drivers, and requires  
273   enforcement of checkpoints for selective blood- and breath-testing for suspected driving under  
274   influence of alcohol or actual hazardous driving, and penalties for determined offences (20). A  
275   graduated licensing system is currently in place (21). Interviewees consistently highlighted poor  
276   integration of enforcement agencies, prioritization of driving offences other than alcohol-related  
277   ones, and infrequent utilization of sobriety checkpoints.

278           **Participant #2:** “They [traffic police] will look at other mistakes, “you have overtaken,  
279           speeding, you haven’t paid insurance”, but they don’t say “Let’s stop him and check if he  
280           is drunk.”

281           **Participant #5:** “The willingness of those enforcement agencies to act... maybe they  
282           haven’t had direction. It requires relations with other governmental and legal institutions,  
283           to be able to show the difference”

## 284   **Availability of alcohol**

285   WHO recommends restrictions on production, retailing and distribution, legal age of purchase,  
286   and drinking in public spaces as means to achieve this (2).

287 Various documents comment on regulating availability of alcohol in Tanzania; restrictions on sale  
288 of alcohol by time and place are provided, as well as governance on handling of already  
289 intoxicated persons. However, there are no restrictions for public environments such as petrol  
290 stations or specific events including weddings and concerts (22,23). While an age limit of 18 years  
291 is stated for purchase of alcohol both on- and off-premises, interviewees frequently reported  
292 traditions from across Tanzania that allow and encourage children to engage in alcohol  
293 production, distribution, and consumption, particularly in Northern Tanzania.

294 **Participant #1:** “At home alcohol was used in every event, recreation, celebration. Boys  
295 starting from twelve or fourteen [age] serve elderly men. He asks you to taste a little then  
296 you give it to him. It was regarded as culture. It's normal”

297 **Participant #4:** “Many have started [using alcohol] at a younger age”

298 Participants noted that alcohol is highly profitable, and retailers may prioritize income over safety  
299 of underage customers.

300 **Participant #2:** “Sometimes people don't think about safety of those young people, what  
301 they look at is money, how much they earn – “If I stop selling to children, they will run  
302 elsewhere, and I may be fired because I have chased away customers”

303 **Participant #6:** “Under 18, it's not allowed. The law exists but people do not enforce it”

304 Another interviewee highlighted the practice of unregulated re-packaging and sale of alcohol in  
305 public spaces. This is in contravention with the ban on alcohol sachets (24), due to their  
306 affordability and inconspicuous packaging, therefore, also easily accessed by youth.

307 **Participant #6:** “Strong alcohols being sold at bus stops. They sell them in small glasses  
308 ranging from 500, 1000 or 2000 shillings. They also sell to adolescents”

309 **Marketing of alcoholic beverages**

310 WHO's global strategy recommends the use of legally-binding restrictions on marketing,  
311 sponsorships, promotions, and product placement that may directly or indirectly target youth; this  
312 includes modern marketing strategies such as social media (2).

313 One of our respondents indicated that alcohol advertisements are often self-regulated by media  
314 outlets, however, decisions are heavily influenced by peak engagement times.

315 **Participant #8:** "These media houses, all they think is money. So, it depends on what time  
316 of day they can get the most listeners. For example, on [name of radio program redacted  
317 for confidentiality purposes] in the morning, we've had ads [on alcohol] go up"

318 There are partial restrictions on sponsorship of events; local brands are prioritized over foreign  
319 ones, particularly for sporting events. Alcohol companies are also not allowed to be the sole  
320 sponsor of an event as guided by regulations on fair competition (25).

321 **Participant #8:** "I don't think they are allowed to sponsor everything. They give a certain  
322 percentage of money to invest for like, a marathon, concerts, or football. And to mostly be  
323 a Tanzanian brand"

324 There are also partial restrictions on sales promotions; auctioning of alcohol products is  
325 permissible with appropriate license and premises (22). However, the Act does not comment on  
326 free- or below-cost promotions by retailers. Furthermore, our searches and interviews did not  
327 produce results on national-level legally-binding regulations on product placement.

328 **Pricing policies**

329 WHO requires member states to establish a system for adjusting prices of alcohol beverages to  
330 account for inflation, excise and duty taxes, with effective implementation and review mechanisms  
331 (2).



332 The Tanzania Revenue Authority (TRA) oversees pricing policies in the country; to instate,  
333 evaluate, collect, and adjust excise and duty-paid taxes on industrial alcohol products, thereby  
334 controlling prices. TRA enforces laws related to these taxes (26,27). However, estimates show  
335 that informally produced alcohol, which is often unregulated, constitutes 86% of all alcohol  
336 consumed in Tanzania (23), indicating that TRA has little control over majority of alcohol  
337 producers.

338 **Participant #5:** “The willingness of those enforcement agencies to act, there may be  
339 differences”

340 Reports reveal the alcohol industry as a growing source of revenue for the government (28).  
341 Locally-produced alcohol is also relatively more affordable and easily accessible than industrial  
342 alcohol. Furthermore, current pricing policies do not account for disproportionate income levels  
343 across different parts of Tanzania (5), and most commonly consumed alcohol products remain  
344 affordable even for those without reliable income (29).

345 **Participant #6:** “These strong alcohols are still very cheap; it becomes a great influence  
346 especially for young people”

### 347 **Reducing the negative consequences of intoxication**

348 To mitigate negative consequences associated with drinking alcohol, policies should take a harm-  
349 reduction approach; to prevent harm among those most at risk. WHO recommends establishing  
350 and enforcing legislation against serving already intoxicated customers, ensuring sufficient server  
351 training, and requiring informative labels about alcohol-related harm (2).

352 Tanzania legally requires health warning labels on alcoholic drinks to promote awareness on age  
353 restrictions and drinking in moderation. The Tanzania Bureau of Standards has regulated these  
354 inclusions to standardize alcoholic products, as well as other items produced in Tanzania (30).

355           **Participant #8:** “They include a tagline “you can’t sell alcohol to someone who is below  
356           18 years”

357       Furthermore, alcohol manufactured industrially must display alcohol content and ingredients on  
358       containers (31), however, there are no requirements for information on contents or additives on  
359       labels.

360       In connection to the lack of a definition for a standard drink, there are no legal requirements for  
361       displaying number of standard drinks on retail containers. Tanzania also lacks legally-binding  
362       requirements for training of persons involved in distribution of alcohol products; recruitment of  
363       drink servers and sellers is unregulated (23).

#### 364       **Reducing the public health impact of illicit alcohol and informally-produced alcohol**

365       WHO recommends developing monitoring systems and imposing the same regulations on  
366       informally-produced or unrecorded alcohol as with industrial alcohol. Member states are required  
367       to develop monitoring systems for the detection of such alcohol, to issue warnings on the health  
368       risks associated with their consumption, and to impose the same regulations on unrecorded  
369       alcohol as with industrial alcohol (2).

370       Tanzania has numerous policy-related documents in place that legally require registration of  
371       alcohol producers (32), regulation of manufacturing (33), and retail and distribution of alcohol  
372       (22,34). However, since more than 80% of consumed alcohol in Tanzania originates from informal  
373       producers (23), coupled with low enforcement, the impact of these regulations is likely to be low,  
374       and particularly in rural areas.

#### 375       **Monitoring and surveillance**

376       WHO recommends national surveys on patterns of alcohol consumption and related harms, and  
377       establishment of bodies to supervise research and reporting of findings (2).

378 All IDIs and online searches indicated lack of national-level surveillance of alcohol consumption  
379 patterns, health and social consequences, and alcohol policy responses.

380 WHO has reported data on alcohol consumption levels and trends in Tanzania as part of a larger  
381 international survey (23). The STEPwise approach to NCD risk factor Surveillance (STEPS)  
382 Survey, also conducted on an international level through WHO, last reported on determinants of  
383 NCDs in Tanzania including alcohol in 2012 (35). Furthermore, there has been a rise in research  
384 activities investigating determinants and outcomes of alcohol consumption in Tanzania over the  
385 past decade (5,11,36,37).

## 386 **Discussion**

387 This review has revealed valuable insights into policies, laws, acts, and actions regarding alcohol  
388 use in Tanzania. There is no national alcohol policy in Tanzania. By using the framework of  
389 composite indicators created by WHO, we explored the extent to which alcohol policy is being  
390 enforced in the country. Our results indicate a lack of engagement between key sectors, and  
391 enforcement, which can have a detrimental effect on effectiveness of existing regulations, and  
392 make alcohol more available; this phenomenon has been observed in a previous policy analysis  
393 (38). A regional policy scoring scheme was conducted in 46 African countries and revealed  
394 Tanzania in 22<sup>nd</sup> place, with medium restrictiveness. This study found a significant association  
395 between lower restrictiveness and higher per capita alcohol consumption (39).

396 While the EAC regional policy document guides prevention programs, treatments services and  
397 coordination of policy, its framework is limited in comparison to the WHO Global Strategy; the  
398 former has fewer indicators of implementation, and is derived from and influenced by literature on  
399 HIV, illicit drugs as well as alcohol. These key differences guided our selection of the WHO  
400 document as our reference for the study.

401 Lack of financing has partly hindered finalization of the national alcohol policy draft. There is  
402 minimal intersectoral linkage between various existing regulations and enforcement agencies;  
403 minimal to no regulation on marketing of alcohol, pricing policies, and national-level surveillance  
404 of consumption trends and socio-economic and health outcomes. Commitment from the  
405 government is more impactful on industrial alcohol producers, which accounts for less than 20%  
406 of consumed alcohol in the country (5). Furthermore, the majority of our findings indicate that  
407 alcohol policy is a relatively low priority for the government, and that an existing regional policy  
408 has negligible impact on national-level implementation.

#### 409 **Interpretation and integration with previous literature**

410 Our research adds to the limited previous literature in this area. For example, a 2012 situational  
411 analysis highlighting resources across Tanzania related to alcohol use and its regulation, focused  
412 primarily on HIV prevention (11). By contrast, our use of the WHO framework allowed a more  
413 comprehensive assessment and comparability with other countries. WHO provides clear  
414 guidance on requirements for its member states; Firstly, a primary responsibility for formulating,  
415 implementing, monitoring and evaluating public policies to reduce the harmful use of alcohol. The  
416 lack of integration and engagement noted in our findings is to be expected given the lack of a  
417 single comprehensive policy. This is similarly emphasized in a regional assessment of alcohol  
418 policy in African countries, whereby re-evaluation and increasing restrictiveness and integration  
419 of policy was recommended (39). Our findings also suggest that through utilizing a socioecological  
420 approach, the health sector can support multi-level interventions and advocate for support within  
421 communities at large. This is supported by previous literature from Tanzania on missed  
422 opportunities to addressing motivators and barriers to seeking care (14).

423 Stricter regulations on physical access to alcohol are an effective, sustainable, and feasible  
424 approach to counteract inappropriate or harmful alcohol use; this is particularly important amongst  
425 the young. Marketing restrictions, by extension, are a key point of intervention to minimize early

426 and inappropriate exposure to alcohol advertising. Our findings indicated strong socio-cultural  
427 drivers for underage drinking, therefore, strategies to address such practices are paramount.  
428 Prospective literature and recent studies from Tanzania similarly indicate that exposure to outdoor  
429 advertisements is one of the primary reasons for alcohol initiation among youth (37,40), and high-  
430 density advertising facilitates underage drinking (5). The Tanzanian government has recently  
431 made an effort to minimize physical access to alcohol among youth by banning the more  
432 affordable alcohol sachets (41). However, our findings indicate that street vendors have found  
433 ways to circumvent these restrictions.

434 Raising the cost of alcoholic beverages is one of the most effective strategies for minimizing  
435 hazardous alcohol use (42). Our findings revealed that prices of alcoholic beverages remain  
436 affordable to most consumers across all ages. Furthermore, unregulated re-packaged alcohol  
437 products are available to the public, and are easily accessed by those at risk. Previous literature  
438 has explored this gap in policy, and identified pricing regulations as successful in reducing rates  
439 of morbidity and mortality (43), violence (44), and unplanned underage pregnancies associated  
440 with alcohol use (45).

441 Illegally-imported and informally-produced alcohol (homemade and small-scale production  
442 beverages) represent unique subsets of consumed alcohol; their alcohol content may be more  
443 difficult to quantify, unknown ingredients may be included, they often cost less than industrial  
444 alcohol products, and levels of their consumption are difficult to monitor. Altogether this poses a  
445 challenge to member states' efforts in regulating alcohol consumption. Lastly, monitoring and  
446 surveillance activities inform enforcement and implementation strategies and allow for more  
447 robust policies. Previous studies echo our findings, emphasizing the need for regulation of  
448 informal alcohol producers (46) and strengthening monitoring systems (47).

## 449 **Strengths and Limitations**

450 To our knowledge, this is the first comprehensive mixed methods alcohol policy review in  
451 Tanzania. Additional incorporation of the WHO framework to guide data collection and structuring  
452 IDIs adds validity to our findings. It contributes to the previous scholarship on alcohol use in  
453 Tanzania, by systematically identifying gaps and opportunities in the alcohol policy landscape in  
454 Tanzania through the use of a pre-existing globally recognized framework for measuring policy  
455 implementation. Furthermore, by utilizing the WHO framework intended for international  
456 audiences, our findings by extension may also offer valuable insights for policy implementation  
457 gaps in other countries.

458 We aimed to maximize validity through the rigorous use of multiple methods including a thorough  
459 search process, and wide range of IDI participants ranging from primary healthcare delivery,  
460 curriculum development, marketing, research, policymaking, CBOs, and Ministry-level officials.  
461 These respondents represent settings where mental health and rehabilitation resources for  
462 people with a history of hazardous alcohol use are sparse; where people are exposed to  
463 production, distribution and advertisements of alcohol from a young age; are known to have little  
464 awareness of alcohol and its effects either through education or community programs; and where  
465 policy development work has faltered.

466 However, this study had several limitations. The majority of our respondents were representative  
467 of regional work and of urban settings, due to challenges in securing interviews with national-level  
468 representatives. These findings, therefore, may not provide an entirely accurate representation of  
469 enforcement across the country. However, since regulation of alcohol predominantly occurs in  
470 urban settings, we are confident in the applicability of these results within that context.  
471 Furthermore, several documents were excluded due to their inclusion under HIV programs;  
472 frequently, alcohol is discussed as a risk factor for HIV and NCDs. Yet, little has been done to  
473 address socio-cultural complexities around alcohol when included in this way. Pending its own

474 policy and comprehensive implementation work, alcohol will likely remain in the shadows of other  
475 priorities. Undeniably, interviews with individuals regarding aspects of their own professional work  
476 may be subject to social desirability biases. However, our desk-review findings corroborate key  
477 opinions stated in the IDIs.

## 478 **Conclusion and recommendations**

479 We have identified lack of overall policy development and co-ordination, poor integration,  
480 enforcement and regulation in relation to Alcohol policy in Tanzania. Our findings strongly suggest  
481 the need for a comprehensive approach to developing an alcohol policy, with key stakeholders  
482 and youth involvement, stronger enforcement, and building on awareness and resources for those  
483 affected by and at risk of harmful alcohol use, to address this issue of concern.

484 The health sector has the potential to be a key supporter of awareness activities, mobilizing  
485 research around alcohol consumption and its associated challenges, which in turn should inform  
486 policy. Further nationwide surveys and other specific studies could add depth to the  
487 understanding of alcohol-related harm in Tanzania. The presence and momentum of CBOs and  
488 modern marketing strategies are yet another opportunity for low- and middle-income countries  
489 such as Tanzania to collaboratively reach, support, and empower people in need. We strongly  
490 recommend increasing government support and collaboration with CBOs to improve knowledge  
491 on alcohol and standardization of services. Lastly, there is need to publicize and consistently  
492 utilize regulations which are already available.

## 493 **List of abbreviations**

494 AA - Alcoholics Anonymous  
495 CBO - Community-based organization  
496 EAC - East African Community  
497 HIV - Human Immunodeficiency Virus  
498 IDI - In-Depth Interview

499 MoEST - Ministry of Education, Science and Technology

500 MoH - Ministry of Health

501 NCD - Non-Communicate Diseases

502 NGO - Non-governmental organization

503 SSA - Sub-Saharan Africa

504 TRA - Tanzania Revenue Authority

505 WHO - World Health Organization

## 506 **Acknowledgements**

507 Sincere gratitude goes out to the respondents for their time and invaluable experience.

## 508 **Declarations**

### 509 **Consent for publication**

510 Not applicable

### 511 **Availability of data and materials**

512 Deidentified datasets used and/or analysed during the current study are available through URL  
513 from the corresponding author on reasonable request.

### 514 **Competing interests**

515 No conflicts of interest were reported by the authors.

### 516 **Funding**

517 This work was supported by a Medical Research Council: Public Health Intervention  
518 Development (PHIND) Grant: MR/V032380/1.

### 519 **Authors' contributions**

520 K.M. led on methodology, study co-ordination, writing, preparation of tables and figures, and  
521 review & editing. A.H. contributed to methodology, writing, review & editing. M.L.S. contributed  
522 to project administration, methodology, study co-ordination, writing, and review & editing. A.O.  
523 and B.M. contributed to review & editing.



524 **Patient and Public Involvement**

525 Patients or the public were involved in the design, or conduct, or reporting, or dissemination  
526 plans of our research.

527 **References**

- 528 1. World Health Organization (WHO). Alcohol. 2022 [cited 2023 Mar 23]. Alcohol. Available  
529 from: <https://www.who.int/news-room/fact-sheets/detail/alcohol>
- 530 2. Hammer JH, Parent MC, Spiker DA, World Health Organization. Global status report on  
531 alcohol and health 2018. Vol. 65. 2018. 74–85 p.
- 532 3. Friedman K, Raymond J, Minnig MC, Sakita F, Vissoci JRN, Staton C. Association between  
533 alcohol use and violence-related injury in emergency department patients in Moshi,  
534 Tanzania: analysis of a prospective trauma registry. *Lancet Glob Health*. 2020 Apr;8:S18.
- 535 4. Puddephatt JA, Irizar P, Jones A, Gage SH, Goodwin L. Associations of common mental  
536 disorder with alcohol use in the adult general population: a systematic review and meta-  
537 analysis. *Addict Abingdon Engl*. 2022 Jun;117(6):1543–72.
- 538 5. Sommer M, Ibitoye M, Kaaya S, Parker R, Likindikoki S. The Influence of Alcohol Outlet  
539 Density and Advertising on Youth Drinking in Urban Tanzania. *Health Place* [Internet].  
540 2019;58. Available from: <https://www.ncbi.nlm.nih.gov/pmc/articles/PMC6708451/>
- 541 6. MOVENDI International. Tanzania: Communities Call for Alcohol Policy to Be Part of  
542 Election Campaign Discourse [Internet]. 2020 [cited 2023 Mar 23]. Available from:  
543 [https://movendi.ngo/news/2020/10/15/tanzania-communities-call-for-alcohol-policy-to-be-](https://movendi.ngo/news/2020/10/15/tanzania-communities-call-for-alcohol-policy-to-be-part-of-election-campaign/)  
544 [part-of-election-campaign/](https://movendi.ngo/news/2020/10/15/tanzania-communities-call-for-alcohol-policy-to-be-part-of-election-campaign/)
- 545 7. World Health Organization (WHO). Towards an action plan (2022 - 2030) to effectively  
546 implement the Global strategy to reduce the harmful use of alcohol [Internet]. 2022 [cited  
547 2023 Mar 23]. Available from: [https://www.who.int/teams/mental-health-and-substance-](https://www.who.int/teams/mental-health-and-substance-use/alcohol-drugs-and-addictive-behaviours/alcohol/our-activities/towards-and-action-plan-on-alcohol)  
548 [use/alcohol-drugs-and-addictive-behaviours/alcohol/our-activities/towards-and-action-plan-](https://www.who.int/teams/mental-health-and-substance-use/alcohol-drugs-and-addictive-behaviours/alcohol/our-activities/towards-and-action-plan-on-alcohol)  
549 [on-alcohol](https://www.who.int/teams/mental-health-and-substance-use/alcohol-drugs-and-addictive-behaviours/alcohol/our-activities/towards-and-action-plan-on-alcohol)
- 550 8. East African Regional Community. EAST AFRICAN COMMUNITY REGIONAL POLICY ON  
551 PREVENTION, MANAGEMENT, AND CONTROL OF ALCOHOL, DRUGS AND OTHER  
552 SUBSTANCE USE. 2019.
- 553 9. World Health Organization (WHO). Policy in action. A tool for measuring alcohol policy  
554 implementation. 2017 p. 1–61.
- 555 10. World Health Organization (WHO). Global strategy to reduce the harmful use of alcohol.  
556 Vol. 15. 2016. 1–23 p.
- 557 11. STRIVE, National Institute of Medical Research (NIMR), Mwanza Intervention Trials Unit  
558 (MITU). SITUATION ANALYSIS REPORT. HIV PROGRAMMING FOR YOUNG PEOPLE IN  
559 TANZANIA : EXISTING STRUCTURES AND ALCOHOL RELATED POLICIES. 2012.

- 560 12. Ministry of Health, Community Development, Gender, Elderly, and Children (MoHCDGEC).  
561 National Health Policy. Minist Health Community Dev Gend Elder Child Tanzan.  
562 2017;(October):1–55.
- 563 13. United Republic of Tanzania. DRAFT UPDATED MENU OF POLICY OPTIONS AND  
564 COST-EFFECTIVE INTERVENTIONS FOR THE PREVENTION AND CONTROL OF NON-  
565 COMMUNICABLE DISEASE. 2019 p. 1–4.
- 566 14. Mushi D, Moshiro C, Hanlon C, Francis JM, Teferra S. Missed opportunity for alcohol use  
567 disorder screening and management in primary health care facilities in northern rural  
568 Tanzania: a cross-sectional survey. *Subst Abuse Treat Prev Policy*. 2022;17(1):1–11.
- 569 15. Madundo K, Knettel BA, Knippler E, Mbwambo J. Prevalence, severity, and associated  
570 factors of depression in newly diagnosed people living with HIV in Kilimanjaro, Tanzania: a  
571 cross-sectional study. *BMC Psychiatry*. 2023 Feb 1;23(1):83.
- 572 16. Azevedo MJ. The State of Health System(s) in Africa: Challenges and Opportunities. In:  
573 Historical Perspectives on the State of Health and Health Systems in Africa, Volume II  
574 [Internet]. Cham: Springer International Publishing; 2017. p. 1–73. Available from:  
575 [http://link.springer.com/10.1007/978-3-319-32564-4\\_1](http://link.springer.com/10.1007/978-3-319-32564-4_1)
- 576 17. Drug Control and Enforcement Authority (DCEA). Guidelines for the Establishment and  
577 Management of Sober Houses in Tanzania Mainland. 2018;1–9.
- 578 18. Pedersen J, Klepp I. Ten Years After - Drug Use and Recovery Among Male Heroin Users  
579 in Zanzibar [Internet]. 2021. Available from: <http://www.hivolda.no/>
- 580 19. Alcoholics Anonymous. AA Tanzania. 2021. p. 1 Welcome to Alcoholics Anonymous in  
581 Tanzania. Available from: <https://aatanzania.net>
- 582 20. United Republic of Tanzania. CAP. 168 The Road Traffic Act, Amendment of 2019. 2019;1–  
583 71.
- 584 21. Tanzania Revenue Authority. Applying driving license for the first time [Internet]. 2023 [cited  
585 2023 Mar 20]. Available from: [https://www.tra.go.tz/index.php/2012-11-20-06-37-07/160-](https://www.tra.go.tz/index.php/2012-11-20-06-37-07/160-applying-driving-license-for-the-first-time)  
586 [applying-driving-license-for-the-first-time](https://www.tra.go.tz/index.php/2012-11-20-06-37-07/160-applying-driving-license-for-the-first-time)
- 587 22. United Republic of Tanzania. The Intoxicating Liquors Act. 1968;1–31.
- 588 23. World Health Organization (WHO) (WHO). ALCOHOL CONSUMPTION: LEVELS AND  
589 PATTERNS: Tanzania. World Health Organ 2018. 2016;2016.
- 590 24. The Citizen. Traders: Alcohol sachets ban big blow. The Citizen [Internet]. 2017; Available  
591 from: [https://www.thecitizen.co.tz/News/Business/Traders--Alcohol-sachets-ban-big-](https://www.thecitizen.co.tz/News/Business/Traders--Alcohol-sachets-ban-big-blow/1840414-3833746-hsxfby/index.html)  
592 [blow/1840414-3833746-hsxfby/index.html](https://www.thecitizen.co.tz/News/Business/Traders--Alcohol-sachets-ban-big-blow/1840414-3833746-hsxfby/index.html)
- 593 25. United Republic of Tanzania. The Fair Competition Act. Parliam United Repub Tanzan.  
594 2003;1–38.
- 595 26. United Republic of Tanzania. The Tanzania Revenue Authority Act, 2006. 2006;5–65.

- 596 27. Tanzania Revenue Authority. Tanzania Revenue Authority: About [Internet]. 2023 [cited 2023  
597 Feb 4]. Available from: <https://www.tra.go.tz/index.php/about-tra>
- 598 28. AllAfrica. AllAfrica. 2019. p. 1 Tanzania: TRA Records 34% Increased Revenues On Liquor.  
599 Available from: <https://allafrica.com/stories/201912040349.html>
- 600 29. Francis JM, Weiss HA, Mshana G, Baisley K, Grosskurth H, Kapiga SH. The epidemiology  
601 of alcohol use and alcohol use disorders among young people in Northern Tanzania. PLoS  
602 ONE. 2015;10(10):1–17.
- 603 30. Tanzania Bureau of Standards (TBS). Tanzania Bureau of Standards - LIQUEURS —  
604 SPECIFICATIONS. Vol. 10. 2017 p. 0–5.
- 605 31. United Republic of Tanzania. The Standards Act - 2009. 2009;(496):1–41.
- 606 32. United Republic of Tanzania. The Business Activities Registration Act. 2007;1–11.
- 607 33. United Republic of Tanzania. The Moshi (Manufacture and Distillation) Act. 1966;(62):1–9.
- 608 34. United Republic of Tanzania. The Excise (Management and Tariff) Act. 2008;1–76.
- 609 35. World Health Organization (WHO). TANZANIA STEPS Survey - 2012. STEPS Survey. 2012  
610 p. 2–3.
- 611 36. Gerry Mshana. Alcohol taxation, pricing and packaging: experiences from Tanzania and  
612 opportunities for structural interventions targeting young people. Mwanza: MITU; NIMR;  
613 LSHTM; 2014 p. 1–27.
- 614 37. Mbata D, Mshana G, Francis J, Wamoyi J, Mongi A, Changalucha J, et al. Alcohol Use and  
615 Drinking Norms among Young People in Northern Tanzania: Preliminary findings from a  
616 qualitative study. STRIVE. 2013.
- 617 38. Casswell S, Morojele N, Williams PP, Chaiyasong S, Gordon R, Gray-Phillip G, et al. The  
618 Alcohol Environment Protocol: A new tool for alcohol policy. Drug Alcohol Rev.  
619 2018;37(November):S18–26.
- 620 39. Ferreira-Borges C, Esser MB, Dias S, Babor T, Parry CDH. Alcohol control policies in 46  
621 African countries: Opportunities for improvement. Alcohol Alcohol. 2015;50(4):470–6.
- 622 40. Jernigan D, Noel J, Landon J, Thornton N, Lobstein T. Alcohol marketing and youth alcohol  
623 consumption: a systematic review of longitudinal studies published since 2008. Addiction.  
624 2017 Jan;112:7–20.
- 625 41. The Guardian. Tanzania bans alcohol sachets. The Guardian [Internet]. 2017; Available  
626 from: <https://guardian.ng/news/tanzania-bans-alcohol-sachets/>
- 627 42. Gibbs N, Angus C, Dixon S, Parry C, Meier P. Effects of minimum unit pricing for alcohol in  
628 South Africa across different drinker groups and wealth quintiles: a modelling study. BMJ  
629 Open. 2021 Aug;11(8):e052879.
- 630 43. Wagenaar AC, Tobler AL, Komro KA. Effects of alcohol tax and price policies on morbidity  
631 and mortality: a systematic review. Am J Public Health. 2010 Nov;100(11):2270–8.

632 44. Booth A, Meier P, Shapland J, Wong R, Paisley S. Alcohol pricing and criminal harm: a  
 633 rapid evidence assessment of the published research literature. The University of Sheffield;  
 634 2018 p. 5–6.

635 45. Sen B. Can Beer Taxes Affect Teen Pregnancy? Evidence Based on Teen Abortion Rates  
 636 and Birth Rates. *South Econ J.* 2003;70(2):328–43.

637 46. Ferreira-Borges C, Parry CDH, Babor TF. Harmful Use of Alcohol: A Shadow over Sub-  
 638 Saharan Africa in Need of Workable Solutions. *Int J Environ Res Public Health* [Internet].  
 639 2017 Mar 27;14(4). Available from: <http://www.ncbi.nlm.nih.gov/pubmed/28346373>

640 47. Rehm J, Poznyak V. On monitoring unrecorded alcohol consumption. *Alcohol Drug Addict.*  
 641 2015 Jun;28(2):79–89.

642 48. Ministry of Health, Community Development, Gender, Eldery and Children (MoHCDGEC).  
 643 Standard Treatment Guidelines and National Essential Medicines List Tanzania Mainland,  
 644 Sixth Edition, 2021. *Gov Tanzan.* 2021;93(3):799–801.

645 49. National AIDS Control Programme; MoHCDGEC; Tanzania TUR of. National Guidelines for  
 646 the Management of HIV and AIDS. *Development.* 2019;7.

647 50. United Republic of Tanzania. The Law Of The Child Act, 2009. 2009;1–79.

648 51. United Republic of Tanzania. The Public Health Act, 2009. 2009;1–102.

649 52. Tanzania Ministry of Health and Social Welfare (MoHSW); National Institute of Medical  
 650 Research (NIMR); World Health Organization (WHO). Tanzania STEPS Survey Report,  
 651 2013. National Institutute for Medical Research (NIMR). 2013 p. 1–154.

652

653 **List of figures**

654 Figure 1. Directory of government actors essential to alcohol-related policies in Tanzania.

655 **List of tables**

656 Table 1. Participants' areas of work

657 Table 2. Significant statements and relevant policy-related documents

658 **Table 4. Relevant policy-related documents Error! Reference source not found.**

| Theme | Sub-theme | Relevant policy-related documents |
|-------|-----------|-----------------------------------|
|-------|-----------|-----------------------------------|

|                                             |                         |                                                                                                                                                                                                                                                                                                                                                                                                                                                                                                                                                                                                                                                                                                                                                                                                                 |
|---------------------------------------------|-------------------------|-----------------------------------------------------------------------------------------------------------------------------------------------------------------------------------------------------------------------------------------------------------------------------------------------------------------------------------------------------------------------------------------------------------------------------------------------------------------------------------------------------------------------------------------------------------------------------------------------------------------------------------------------------------------------------------------------------------------------------------------------------------------------------------------------------------------|
| <b>Leadership, awareness and commitment</b> | Written national policy | No national policy<br><br>The Moshi (Manufacture and Distillation Act (1966) (33):<br><i>An Act to regulate the production, sale, and distribution of alcohol in Tanzania</i><br><br>The Business Activities Registration Act (2007) (32): <i>An Act to govern registration of all businesses including industrial alcohol producers</i><br><br>The Intoxicating Liquors Act (1968) (22): <i>An Act to govern alcohol licensure; legality of premises, hours, and environments regarding alcohol; and provides definition of an alcoholic beverage</i><br><br>The Road Traffic Act (2002) (20): <i>Road safety, breath testing, sobriety checkpoints</i><br><br>The Standards Act (2009) (31): <i>An Act that regulates standardization of locally-produced and imported products; Ensuring quality control</i> |
|                                             | National action plan    | No specific national action plan<br><br>East African Community Regional Policy on Prevention, Management, and Control of Alcohol, Drugs, and Other Substance Use (2019) (8): <i>A comprehensive policy to bridge weaknesses in national policies, programs, and other related documents</i>                                                                                                                                                                                                                                                                                                                                                                                                                                                                                                                     |

|                                                   |                                                                                                                            |                                                                                                                                                                                                                                                                                                                                                                                                                                      |
|---------------------------------------------------|----------------------------------------------------------------------------------------------------------------------------|--------------------------------------------------------------------------------------------------------------------------------------------------------------------------------------------------------------------------------------------------------------------------------------------------------------------------------------------------------------------------------------------------------------------------------------|
|                                                   | Presence of awareness-raising activities                                                                                   | No national-level awareness-raising activities specifically targeting alcohol use                                                                                                                                                                                                                                                                                                                                                    |
| <b>Health services' response</b>                  | Presence of a national focal point whether organizational or individual, for monitoring and reporting alcohol-related harm | No known individual- or organization-based focal points allocated to respond to alcohol issues alone on a national-level<br><br>Standard Treatment Guidelines and National Essential Medicines List Tanzania Mainland, Sixth Edition (2021) (48)<br><br>National Guidelines for the Management of HIV and AIDS, Seventh edition (2019) (49): <i>Contains chapter on evidence-based essential treatment for hazardous alcohol use</i> |
| <b>Community and workplace action</b>             | National support for community action                                                                                      | No known national-level support for community action<br><br>No known national-level legislature that explicitly requires school-based alcohol prevention or reduction programs<br><br>In development – National guidelines for sober houses                                                                                                                                                                                          |
| <b>Drink-driving policies and countermeasures</b> | National minimum legal blood                                                                                               | “Eighty milligrams alcohol per hundred milliliters of blood (0.08%)”                                                                                                                                                                                                                                                                                                                                                                 |

|                                |                                                                             |                                                                                                                                                                                                                                                  |
|--------------------------------|-----------------------------------------------------------------------------|--------------------------------------------------------------------------------------------------------------------------------------------------------------------------------------------------------------------------------------------------|
|                                | alcohol concentration (BAC) when driving a vehicle (as a percentage).       | -Road Traffic Act (2002) (20): <i>An Act to govern registration, and appropriate and safe use of motor vehicles. Provides definition of legal blood alcohol limit</i>                                                                            |
|                                | Sobriety checkpoints                                                        | Road Traffic Act (2002) (20)                                                                                                                                                                                                                     |
|                                | Random breath-testing                                                       | Road Traffic Act (2002) (20)                                                                                                                                                                                                                     |
|                                | Graduated licensing                                                         | Applying driving license for the first time – Tanzania Revenue Authority (21)                                                                                                                                                                    |
| <b>Availability of alcohol</b> | National control of production, import, sale, distribution and export       | The Moshi (Manufacture and Distillation Act (1966) (33)<br><br>The Excise (Management and Tariff) Act (2008) (34): <i>Regulates creation of excisable goods, and collection of excise duties</i><br><br>The Intoxicating Liquors Act (1978) (22) |
|                                | National legal minimum age for on-/off-premise sales of alcoholic beverages | The Intoxicating Liquors Act (1978) (22)<br><br>The Law of the Child Act (2009) (50): <i>Consolidates legislature relating to minors, condemning engagement of children in potentially harmful activities including use of alcohol</i>           |

|                                         |                                                               |                                                                                                                                                                                |
|-----------------------------------------|---------------------------------------------------------------|--------------------------------------------------------------------------------------------------------------------------------------------------------------------------------|
|                                         | Restrictions for on-/off-premise sales of alcoholic beverages | The Intoxicating Liquors Act (1978) (22)                                                                                                                                       |
|                                         | Restrictions on drinking in public places                     | The Public Health Act (2009) (51): <i>Regulates conduct of alcohol outlets and recreational spaces in the interest of promoting, preserving, and maintaining public health</i> |
| <b>Marketing of alcoholic beverages</b> | Alcohol advertising                                           | No known legally-binding restrictions on alcohol-advertising at the national-level                                                                                             |
|                                         | Product placement                                             | No known legally-binding restrictions on product placement at the national-level                                                                                               |
|                                         | Alcohol sponsorship                                           | The Fair Competition Act (2003) (25): <i>Promotes and protects competition in trade, and protects consumers from misconduct related to market and commerce</i>                 |
|                                         | Sales promotions                                              | The Intoxicating Liquors Act (1978) (22)                                                                                                                                       |
| <b>Pricing policies</b>                 | Inflation adjustment                                          | Tanzania Revenue Authority Act (2006) (26): <i>Legislation on pricing policies, excise duties, and impartial taxes on behalf of the Central Government</i>                     |
|                                         | Excise tax                                                    | The Excise (Management and Tariff) Act (2008) (34)                                                                                                                             |
|                                         | Duty tax                                                      | The Excise (Management and Tariff) Act (2008) (34)                                                                                                                             |
|                                         | Price                                                         | Tanzania Revenue Authority Act (2006) (26)                                                                                                                                     |



|                                                                                                                  |                                     |                                                                                                                                     |
|------------------------------------------------------------------------------------------------------------------|-------------------------------------|-------------------------------------------------------------------------------------------------------------------------------------|
|                                                                                                                  | measures<br>other than<br>taxation  |                                                                                                                                     |
| <b>Reducing the<br/>negative<br/>consequences of<br/>intoxication</b>                                            | Health<br>warning labels            | The Standards Act (2009) (31): <i>Governs fees and charges related to products produced in and imported in Tanzania</i>             |
|                                                                                                                  | Consumer<br>information             | The Standards Act (2009) (31)                                                                                                       |
|                                                                                                                  | Standard<br>drinks                  | No known definition of a standard drink                                                                                             |
|                                                                                                                  | Alcohol<br>content                  | The Standards Act (2009) (31)                                                                                                       |
|                                                                                                                  | Server<br>training                  | No known legally-binding requirements for server training                                                                           |
| <b>Reducing the<br/>public health<br/>impact of illicit<br/>alcohol and<br/>informally-<br/>produced alcohol</b> | Preventing<br>illegal<br>production | The Business Activities Registration Act (2007) (32)                                                                                |
|                                                                                                                  | Preventing<br>illegal sale          | The Intoxicating Liquors Act (1978) (22)                                                                                            |
| <b>Monitoring and<br/>surveillance</b>                                                                           | National<br>monitoring<br>systems   | <i>National report on consumption levels and trends (through WHO) (23): Report prepared by WHO with data estimates for Tanzania</i> |
|                                                                                                                  | National                            | <i>STEPS Survey (through WHO) (52): A standardized</i>                                                                              |

|  |         |                                                                                             |
|--|---------|---------------------------------------------------------------------------------------------|
|  | surveys | <i>method conducted through WHO for collection, analysis, and dissemination of NCD data</i> |
|--|---------|---------------------------------------------------------------------------------------------|

659

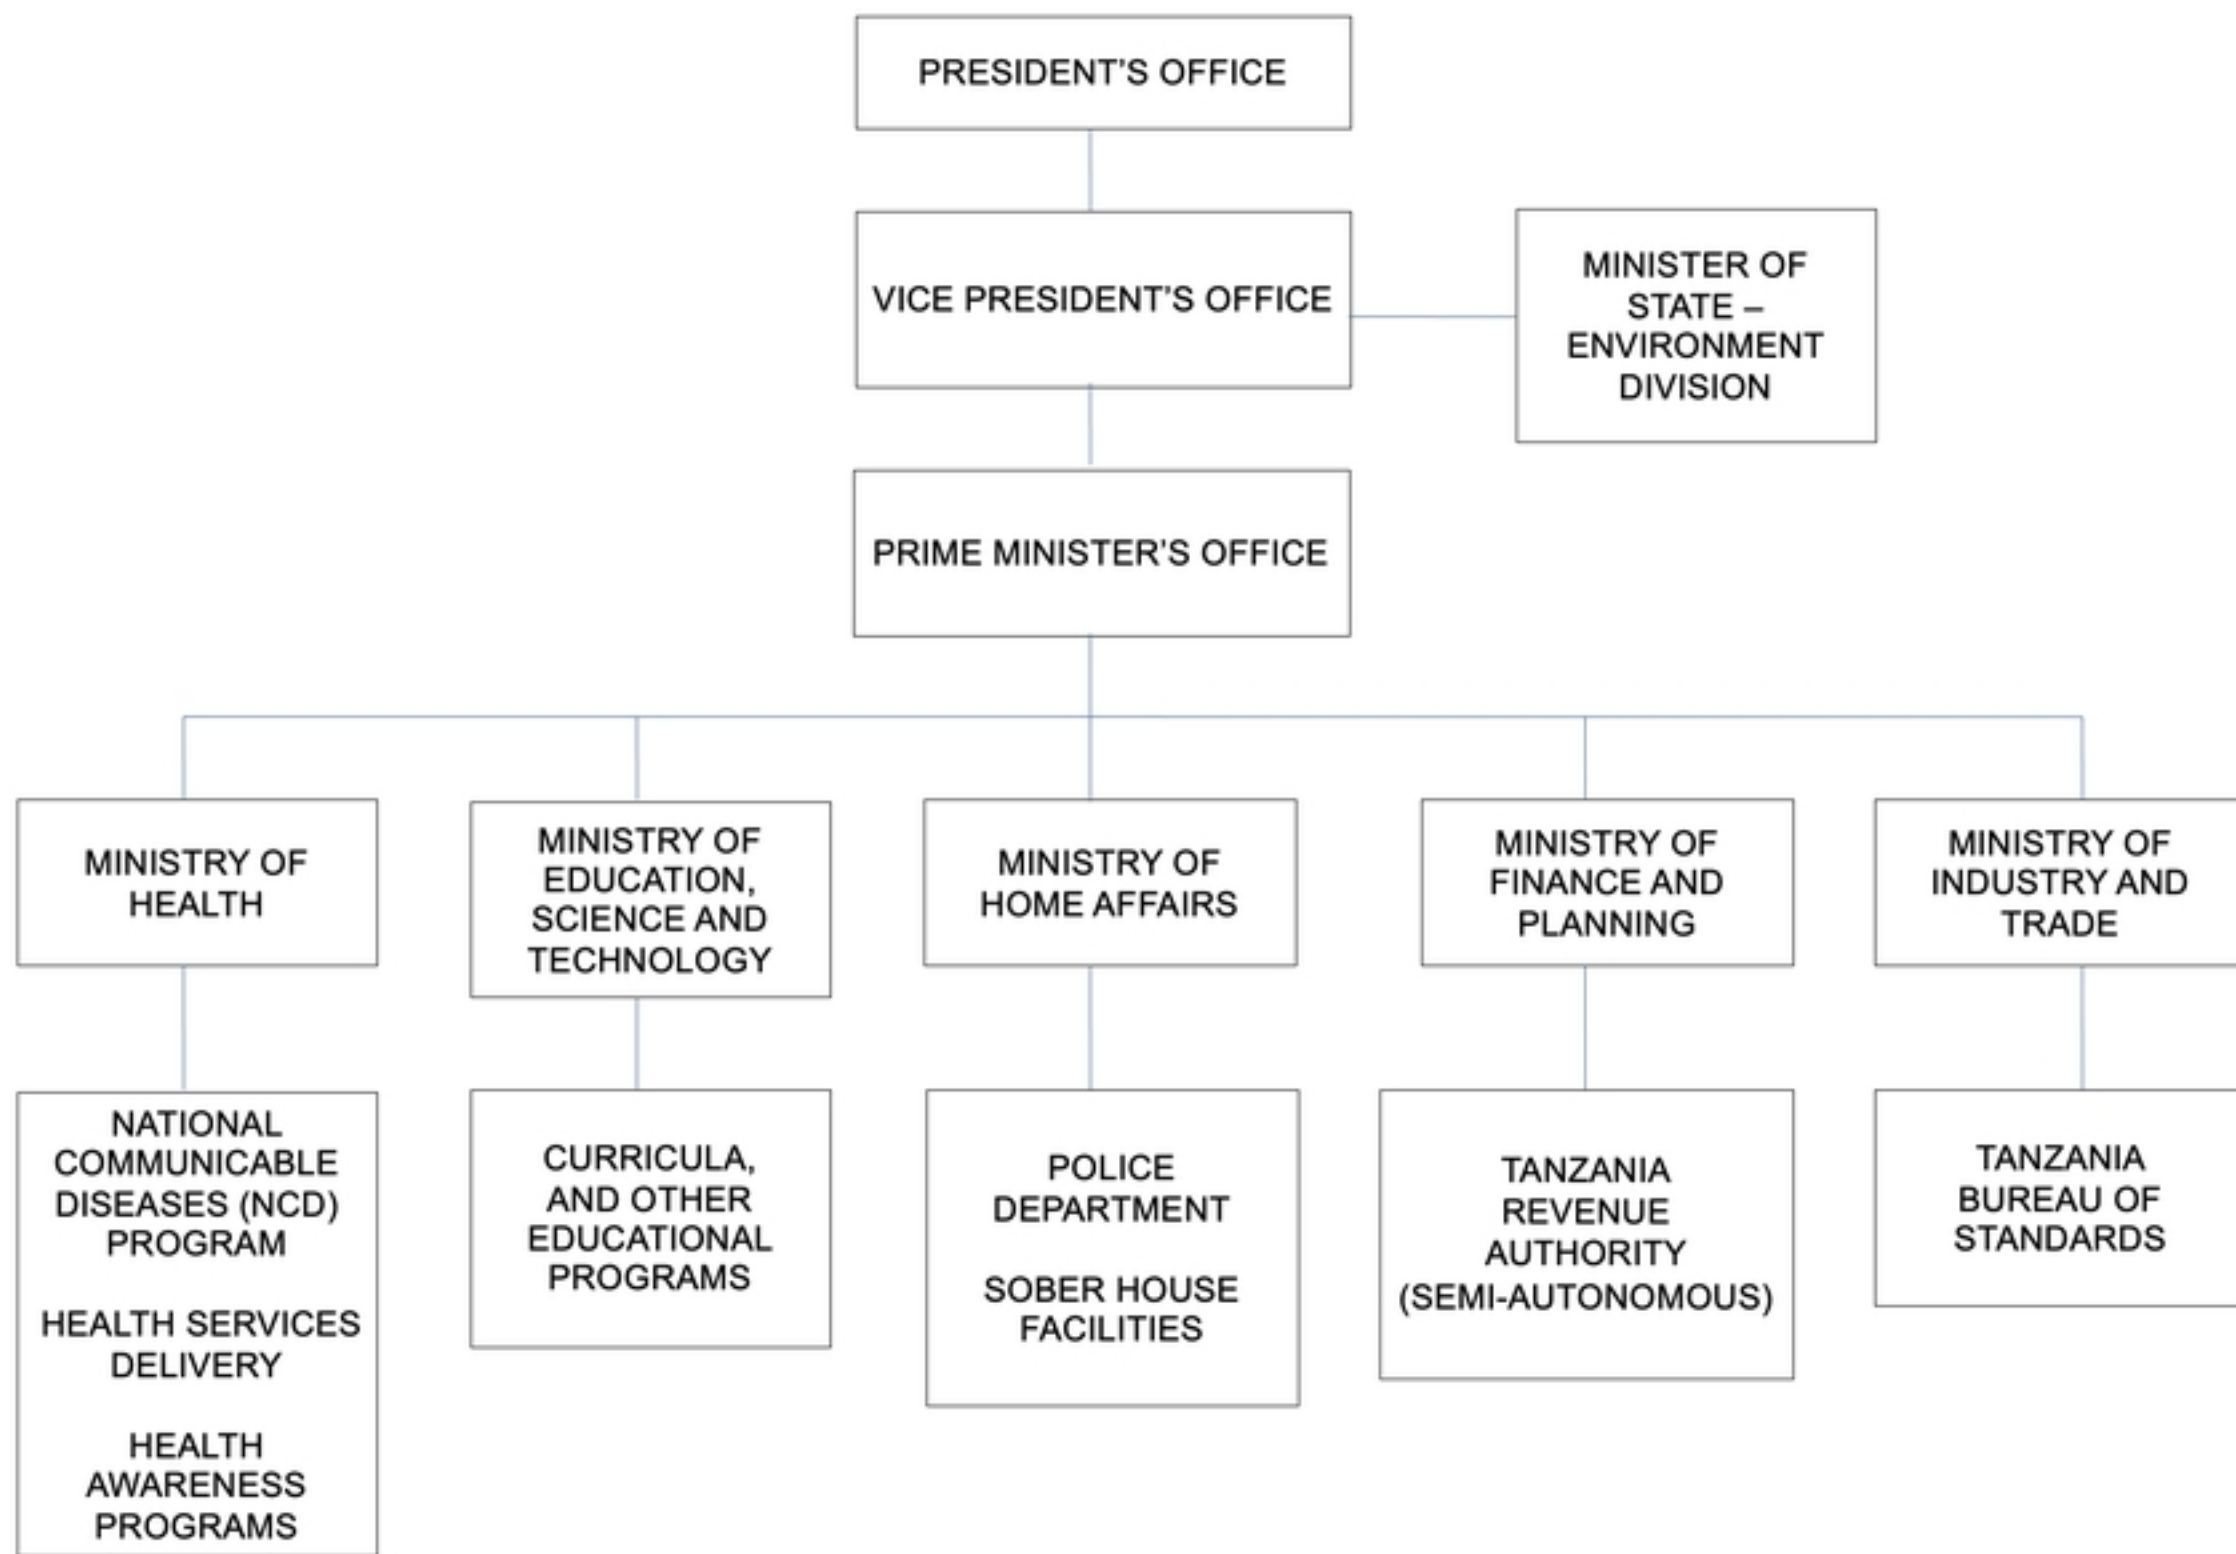

Fig 1. Government organogram
